# Supplementary material
Source: PubMed Central journal article supplement (PMC3069773)
Supplement: JCI44442sd.pdf [file JCI44442sd.pdf]

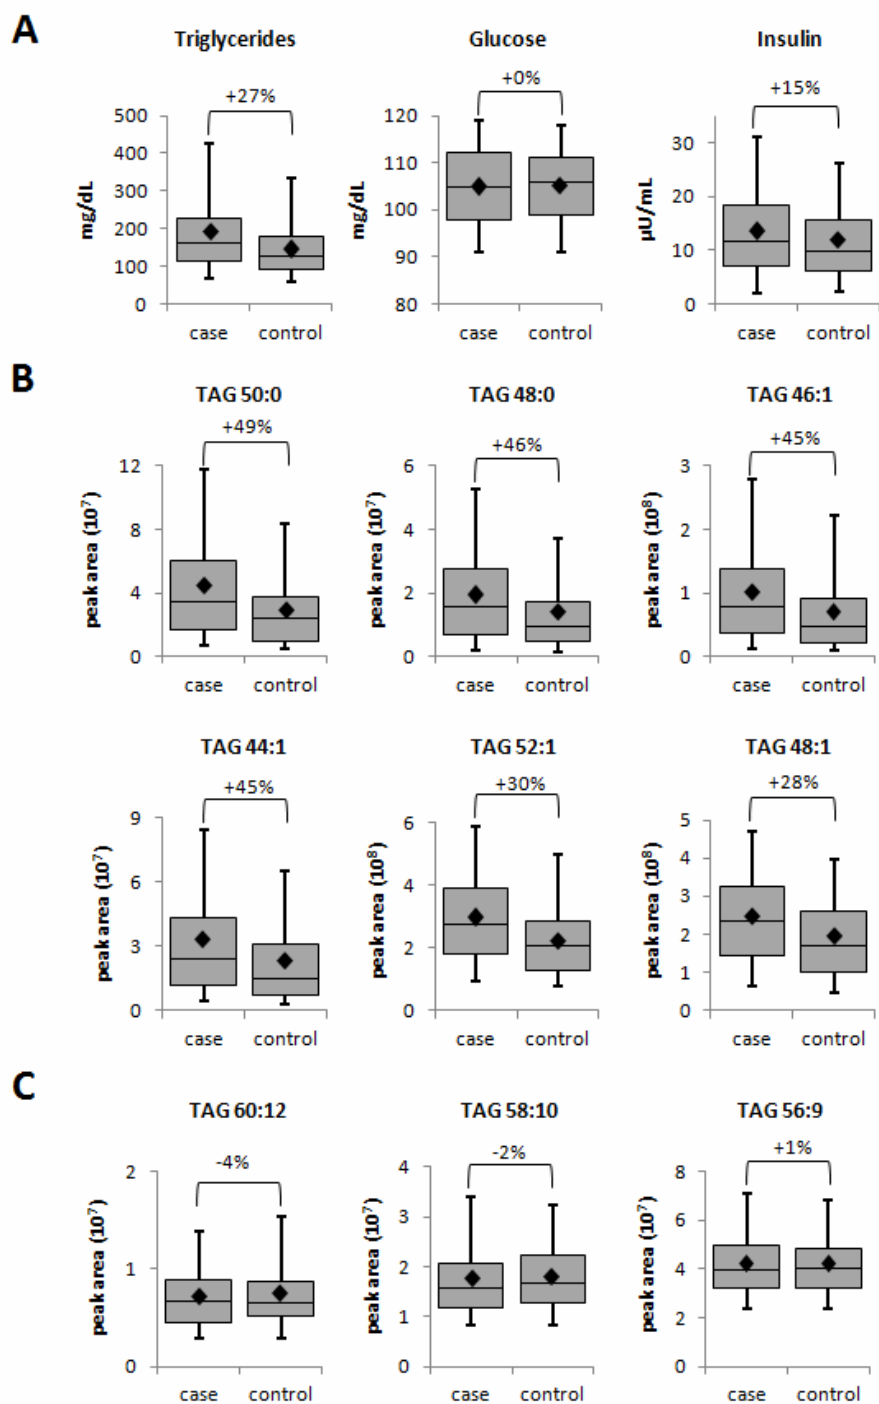

**Supplementary Figure 1.** Significant TAG predictors in FHS. Box and whisker plots for clinical laboratory measures (A), TAGs associated with increased risk of type 2 diabetes (B), and TAGs associated with decreased risk of type 2 diabetes in FHS (C). All data are unadjusted. The lines in the boxes indicate median levels; the lower and upper boundaries of the box represent the 25<sup>th</sup> and 75<sup>th</sup> percentiles respectively; the lower and upper whiskers represent the 5<sup>th</sup> and 95<sup>th</sup> percentiles respectively. The diamonds in the boxes indicate mean areas, and the corresponding percent difference between these means (case versus control) is shown in each figure.

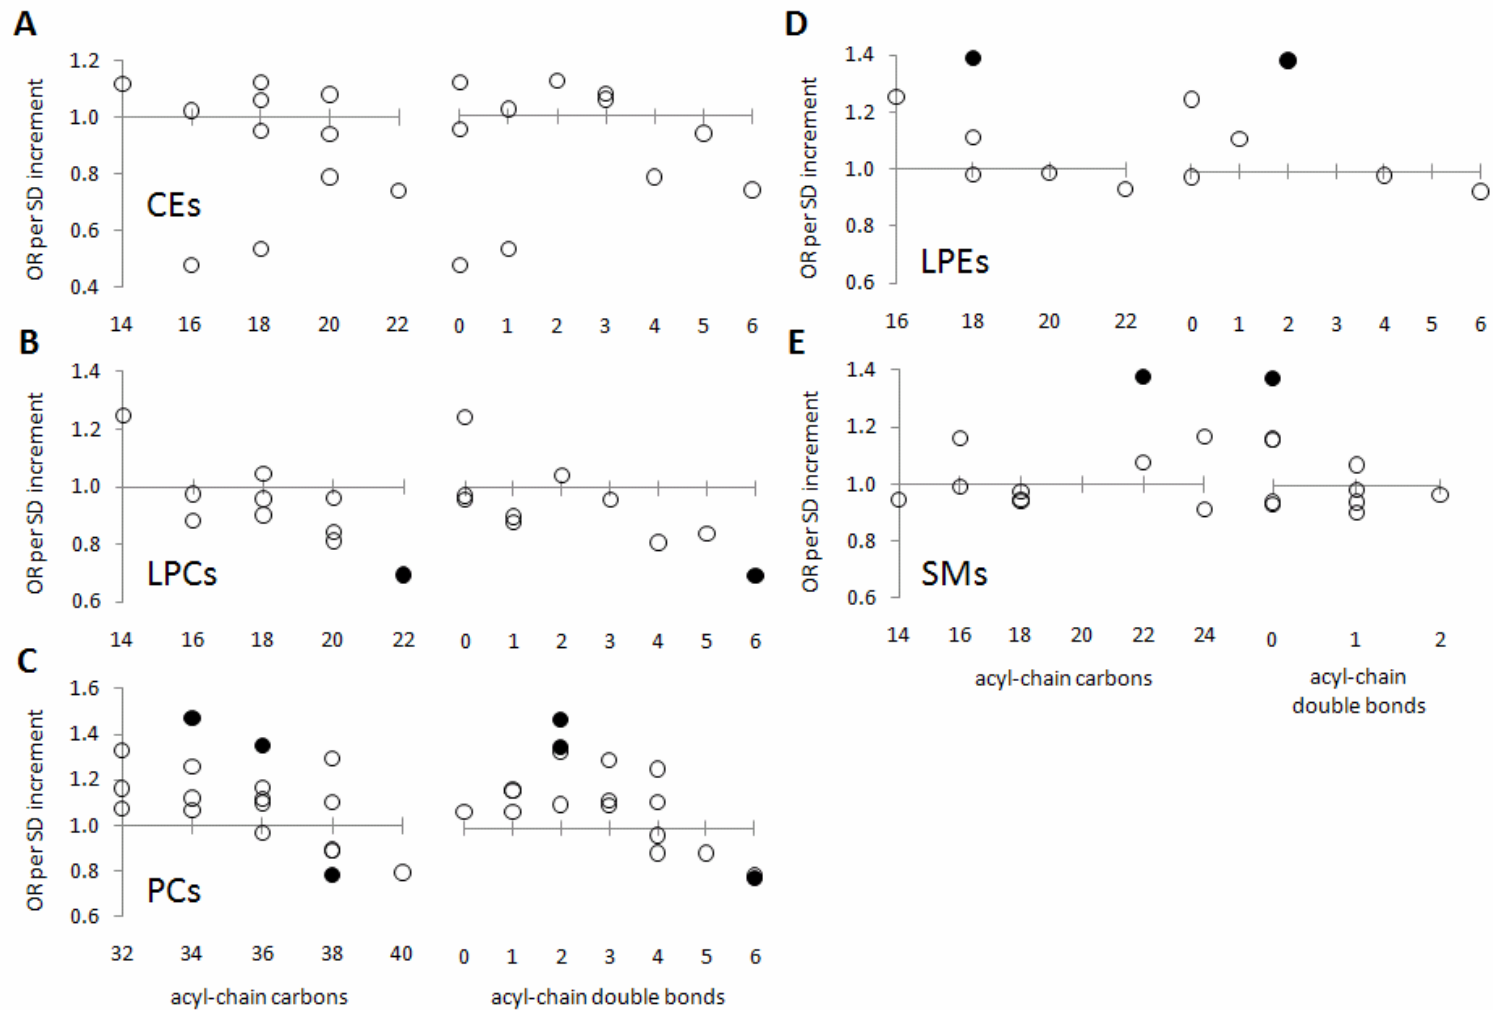

**Supplementary Figure 2.** Lipid risk pattern following multivariable adjustment for non-TAG lipids. Conditional logistic regression models were fitted to assess the association between baseline lipid levels and future diabetes, adjusting for age, sex, BMI, fasting glucose, fasting insulin, total triglycerides, and HDL cholesterol. Odds ratio (OR) for future diabetes per standard deviation (SD) increment of each lipid is shown for **(A)** cholesterol esters (CEs), **(B)** lysophosphatidylcholines (LPCs), **(C)** phosphatidylcholines (PCs), **(D)** lysophosphatidylethanolamines (LPEs), and **(E)** sphingomyelins (SMs), organized along the x-axis based on total acyl chain carbon number (left panel) or double bond content (right panel). Solid circles,  $p < 0.05$  for relating diabetes to lipid.

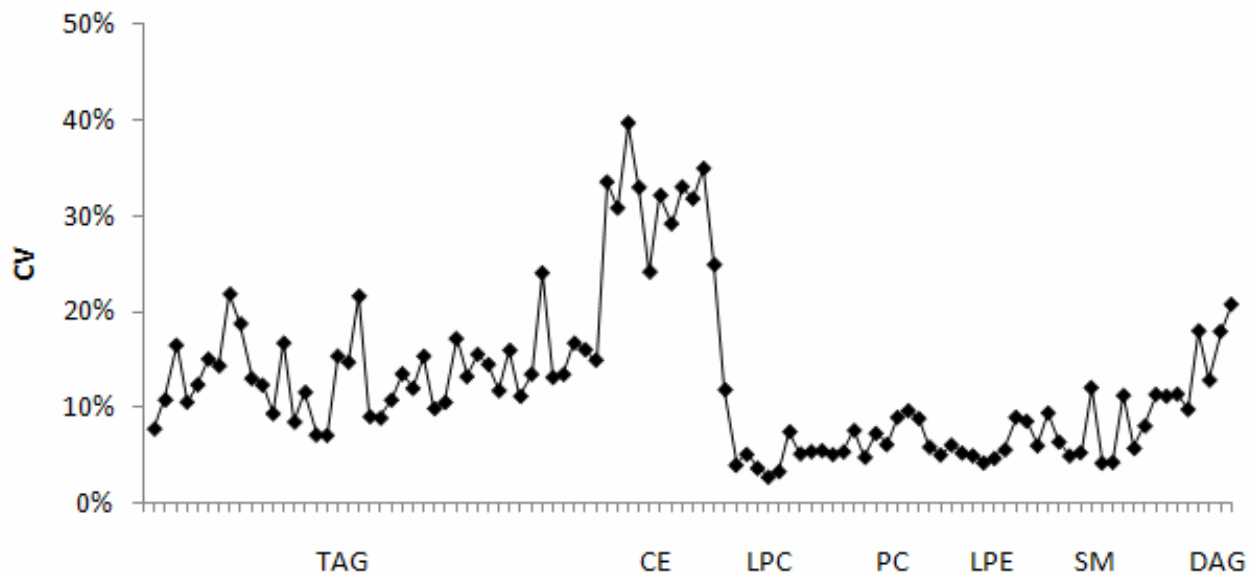

**Supplementary Figure 3.** Analytic performance of the lipid profiling platform. The CVs for each lipid analyte across a total of 29 pooled plasma samples are shown. Pooled plasma was profiled approximately every 30 samples in the overall experimental queue.

**Supplementary Table 1: TAG correlations with HOMA-IR and total triglycerides in FHS**

| <b>Lipid</b> | <b>Spearman correlation with HOMA-IR</b> | <b>P-value</b> | <b>Spearman correlation with total triglycerides</b> | <b>P-value</b> |
|--------------|------------------------------------------|----------------|------------------------------------------------------|----------------|
| TAG 44:1     | 0.29                                     | <0.0001        | 0.63                                                 | <0.0001        |
| TAG 46:2     | 0.33                                     | <0.0001        | 0.73                                                 | <0.0001        |
| TAG 46:1     | 0.33                                     | <0.0001        | 0.73                                                 | <0.0001        |
| TAG 48:4     | 0.26                                     | <0.0001        | 0.65                                                 | <0.0001        |
| TAG 48:3     | 0.33                                     | <0.0001        | 0.85                                                 | <0.0001        |
| TAG 48:2     | 0.35                                     | <0.0001        | 0.82                                                 | <0.0001        |
| TAG 48:1     | 0.33                                     | <0.0001        | 0.66                                                 | <0.0001        |
| TAG 48:0     | 0.35                                     | <0.0001        | 0.63                                                 | <0.0001        |
| TAG 50:5     | 0.27                                     | <0.0001        | 0.68                                                 | <0.0001        |
| TAG 50:4     | 0.33                                     | <0.0001        | 0.89                                                 | <0.0001        |
| TAG 50:3     | 0.35                                     | <0.0001        | 0.90                                                 | <0.0001        |
| TAG 50:2     | 0.33                                     | <0.0001        | 0.69                                                 | <0.0001        |
| TAG 50:0     | 0.36                                     | <0.0001        | 0.73                                                 | <0.0001        |
| TAG 52:6     | 0.24                                     | <0.0001        | 0.67                                                 | <0.0001        |
| TAG 52:5     | 0.25                                     | <0.0001        | 0.74                                                 | <0.0001        |
| TAG 52:4     | 0.21                                     | <0.0001        | 0.66                                                 | <0.0001        |
| TAG 52:3     | 0.19                                     | 0.0002         | 0.51                                                 | <0.0001        |
| TAG 52:2     | 0.29                                     | <0.0001        | 0.76                                                 | <0.0001        |
| TAG 52:1     | 0.37                                     | <0.0001        | 0.84                                                 | <0.0001        |
| TAG 54:10    | 0.26                                     | <0.0001        | 0.62                                                 | <0.0001        |
| TAG 54:9     | 0.26                                     | <0.0001        | 0.72                                                 | <0.0001        |
| TAG 54:8     | 0.15                                     | 0.0044         | 0.60                                                 | <0.0001        |
| TAG 54:7     | 0.16                                     | 0.0015         | 0.57                                                 | <0.0001        |
| TAG 54:6     | 0.17                                     | 0.0007         | 0.55                                                 | <0.0001        |
| TAG 54:5     | 0.11                                     | 0.032          | 0.41                                                 | <0.0001        |
| TAG 54:4     | 0.09                                     | 0.093          | 0.22                                                 | <0.0001        |
| TAG 54:3     | 0.25                                     | <0.0001        | 0.66                                                 | <0.0001        |
| TAG 54:2     | 0.33                                     | <0.0001        | 0.85                                                 | <0.0001        |
| TAG 56:10    | 0.21                                     | <0.0001        | 0.61                                                 | <0.0001        |
| TAG 56:9     | 0.11                                     | 0.027          | 0.50                                                 | <0.0001        |
| TAG 56:8     | 0.11                                     | 0.041          | 0.41                                                 | <0.0001        |
| TAG 56:7     | 0.03                                     | 0.62           | 0.32                                                 | <0.0001        |
| TAG 56:6     | -0.07                                    | 0.2            | 0.10                                                 | 0.045          |
| TAG 56:5     | 0.07                                     | 0.16           | 0.39                                                 | <0.0001        |
| TAG 56:4     | 0.16                                     | 0.0021         | 0.56                                                 | <0.0001        |
| TAG 56:3     | 0.27                                     | <0.0001        | 0.79                                                 | <0.0001        |
| TAG 58:12    | 0.15                                     | 0.0029         | 0.46                                                 | <0.0001        |
| TAG 58:11    | 0.12                                     | 0.019          | 0.44                                                 | <0.0001        |
| TAG 58:10    | 0.10                                     | 0.058          | 0.40                                                 | <0.0001        |
| TAG 58:9     | 0.01                                     | 0.78           | 0.22                                                 | <0.0001        |
| TAG 58:8     | -0.07                                    | 0.17           | 0.04                                                 | 0.48           |
| TAG 60:12    | 0.02                                     | 0.69           | 0.31                                                 | <0.0001        |

HOMA-IR: homeostasis model assessment of insulin resistance

**Supplementary Table 2: Lipid levels and risk of future diabetes adjusted for parental history**

| Lipid                                 | Baseline Model <sup>A</sup> |         | Baseline Model <sup>A</sup> + Parental History <sup>B</sup> |         |
|---------------------------------------|-----------------------------|---------|-------------------------------------------------------------|---------|
|                                       | OR per SD                   | P-value | OR per SD                                                   | P-value |
| <b>TAG 52:1</b>                       | 1.94                        | 0.009   | 1.78                                                        | 0.026   |
| <b>TAG 50:0</b>                       | 1.74                        | 0.005   | 1.66                                                        | 0.010   |
| <b>PC 34:2</b>                        | 1.47                        | 0.021   | 1.50                                                        | 0.019   |
| <b>TAG 48:1</b>                       | 1.47                        | 0.026   | 1.41                                                        | 0.048   |
| <b>TAG 46:1</b>                       | 1.44                        | 0.043   | 1.36                                                        | 0.097   |
| <b>TAG 48:0</b>                       | 1.41                        | 0.042   | 1.40                                                        | 0.046   |
| <b>TAG 44:1</b>                       | 1.41                        | 0.036   | 1.32                                                        | 0.092   |
| <b>LPE 18:2</b>                       | 1.39                        | 0.016   | 1.38                                                        | 0.018   |
| <b>SM 22:0</b>                        | 1.38                        | 0.022   | 1.29                                                        | 0.072   |
| <b>PC 36:2</b>                        | 1.35                        | 0.039   | 1.32                                                        | 0.059   |
| <b>TAG 58:10</b>                      | 0.67                        | 0.006   | 0.68                                                        | 0.010   |
| <b>LPC 22:6</b>                       | 0.69                        | 0.006   | 0.69                                                        | 0.007   |
| <b>TAG 56:9</b>                       | 0.70                        | 0.017   | 0.71                                                        | 0.024   |
| <b>TAG 60:12</b>                      | 0.74                        | 0.022   | 0.75                                                        | 0.030   |
| <b>PC 38:6</b>                        | 0.78                        | 0.049   | 0.77                                                        | 0.047   |
| <b>TAG 50:0+TAG 58:10<sup>C</sup></b> | 2.72                        | 0.001   | 2.72                                                        | 0.001   |

<sup>A</sup>Adjusted for age, sex, BMI, fasting glucose, fasting insulin, triglycerides, and HDL cholesterol

<sup>B</sup>Parental history information missing in 57 participants

<sup>C</sup>For the combination of TAGs 50:0 and 58:10, values represent results for a weighted score comprised of coefficients for each TAG that were estimated from individually fitted models.
